# Supplementary material for: Dipyrrin based luminescent cyclometallated palladium and platinum complexes
Source: Royal Society of Chemistry journal article supplement (doi:10.1039/b908424j), 2009-10-26
Supplement: b908424j.pdf [file b908424j.pdf]

**Electronic Supplementary Information**

**Dipyrin based luminescent cyclometallated palladium and platinum  
complexes**

*by Catherine Bronner,<sup>a</sup> Stéphane A. Baudron,<sup>\*a</sup> Mir Wais Hosseini,<sup>\*a</sup>  
Cristian A. Strassert,<sup>b,c</sup> Aurélie Guenet,<sup>b</sup> and Luisa De Cola<sup>\*b</sup>*

<sup>a</sup> Laboratoire de Chimie de Coordination Organique, UMR CNRS 7140, Université Louis Pasteur, F-67000, Strasbourg, France. E-mail: sbaudron@chimie.u-strasbg.fr, hosseini@chimie.u-strasbg.fr

<sup>b</sup> Physikalisches Institut, Westfälische Wilhelms-Universität Münster, Mendelstrasse 7, D-48149 Münster, Germany. E-mail: decola@uni-muenster.de

<sup>c</sup> Dutch Polymer Institute (DPI), P.O. Box 902, 5600 AX Eindhoven, The Netherlands.

### Spectroscopic characterization

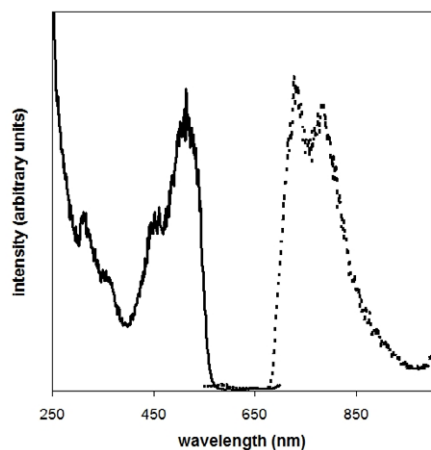

Figure S1. Emission (dotted line) and excitation (solid line) spectra of complex **6** in CH<sub>2</sub>Cl<sub>2</sub> at 77K.

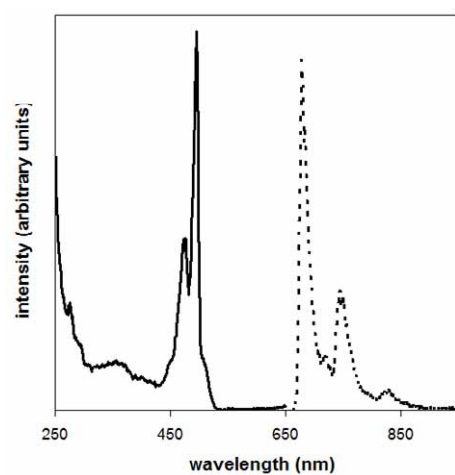

Figure S2. Emission (dotted line) and excitation (solid line) spectra of complex **7** in CH<sub>2</sub>Cl<sub>2</sub> at 77K.

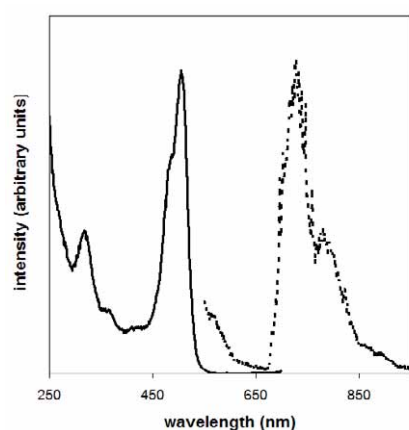

Figure S3. Emission (dotted line) and excitation (solid line) spectra of complex **8** in CH<sub>2</sub>Cl<sub>2</sub> at 77K.
